# Supplementary material
Source: Elsevier journal article supplement (https://www.sciencedirect.com/science/article/pii/S2173580821001358)

**Material suplementario. Tablas**

Tabla I. Códigos diagnósticos para la determinación de comorbilidades, factores de riesgo y antecedentes patológicos

| **Patología o factor de riesgo** | **Códigos diagnósticos** | **Clasificación** |
| --- | --- | --- |
| Cardiopatía isquémica | 410xx, 411xx, 412, 413xx, 414xx, 99603, V4581, V4582 | CIE-9-MC |
| HTA | 401x, 402xx, 403xx, 404xx, 405xx | CIE-9-MC |
| Diabetes | 250xx | CIE-9-MC |
| Hipercolesterolemia | 2720-2724 | CIE-9-MC |
| Enfermedad arterial periférica | 0930x, 4373x, 440xx, 441xx, 4431x, 4432x, 4438x, 4439x, 4471x, 5571x, 5579x, V344x | CIE-9-MC |
| Fibrilación auricular | 42731 | CIE-9-MC |
| Tratamiento en fase aguda | **Códigos de procedimiento** |  |
| Trombolítico intravenoso | 9910 | CIE-9-MC |
| Endovascular | 0061-0065, 3974, 3975, 3976, 3979, 3990 | CIE-9-MC |

Fuente: MUSSCAT

Tabla II. Códigos ATC para la determinación del tratamiento farmacológico

| **Fármaco** | **Códigos** | **Clasificación** |
| --- | --- | --- |
| Total de antitrombóticos | B01A | ATC |
| Total de anticoagulantes |  | ATC |
| AntVK | B01AA | ATC |
| Anticoagulantes directos | B01AE | ATC |
| Antiagregantes | B01AC | ATC |
| Antiinflamatorios no esteroideos | M01A, M01B | ATC |
| Analgésicos | N02A, N02B | ATC |
| Beta-Bloqueadores | C07A, | ATC |
| Estatinas | C10AA | ATC |
| Antidepresivos | N06A | ATC |

Código ATC= Sistema de Clasificación Anatómica, Terapéutica, Química

Fuente: MUSSCAT

**Material suplementario. Figuras**

Figura I. Tasa mensual de visitas en atención primaria


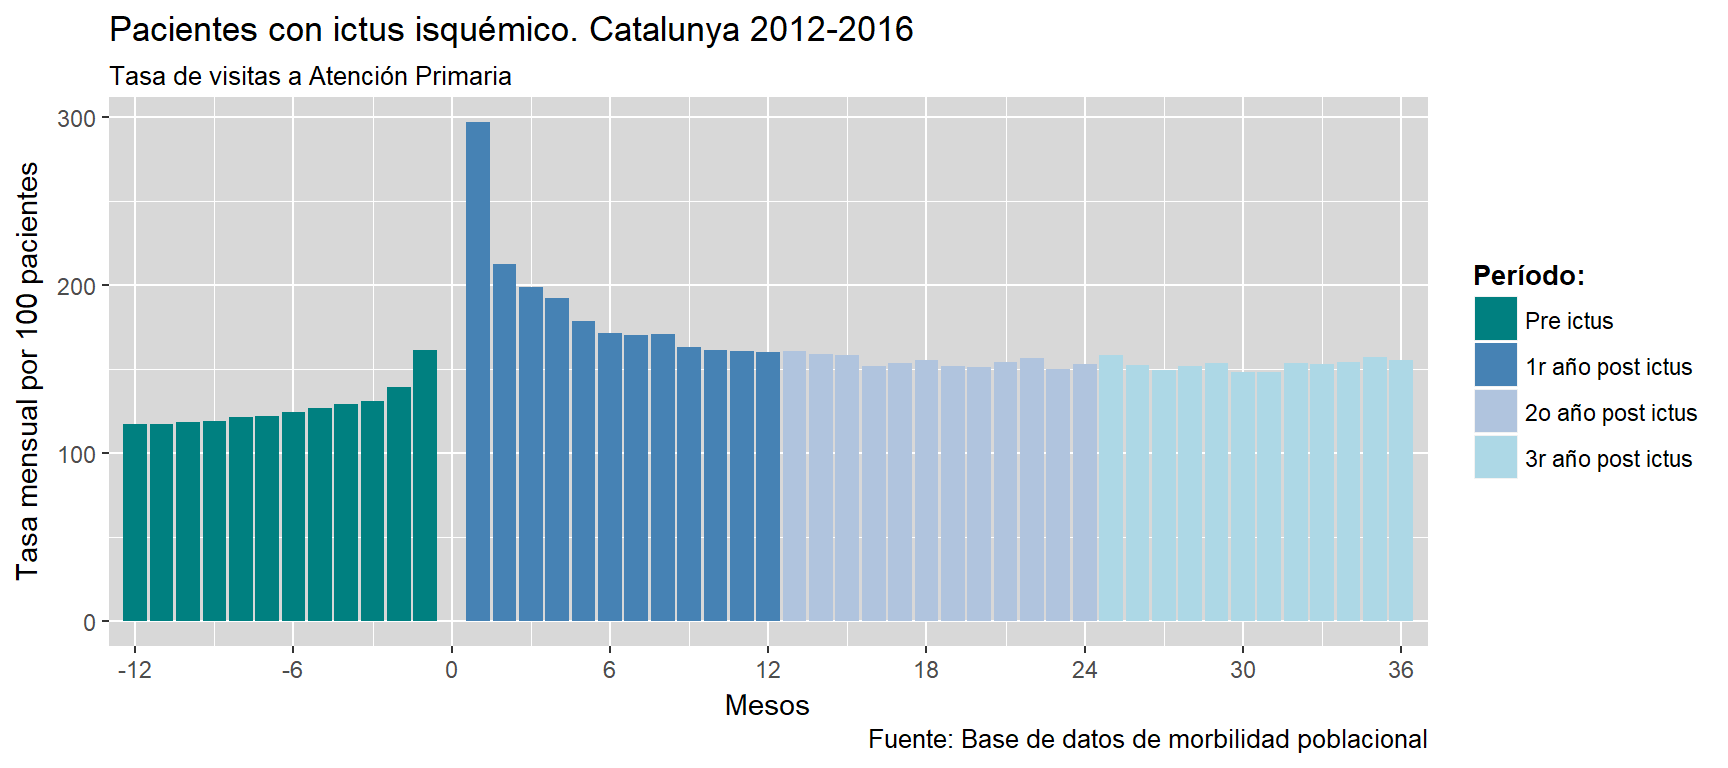


Figura II. Tasa mensual de ingresos hospitalarios


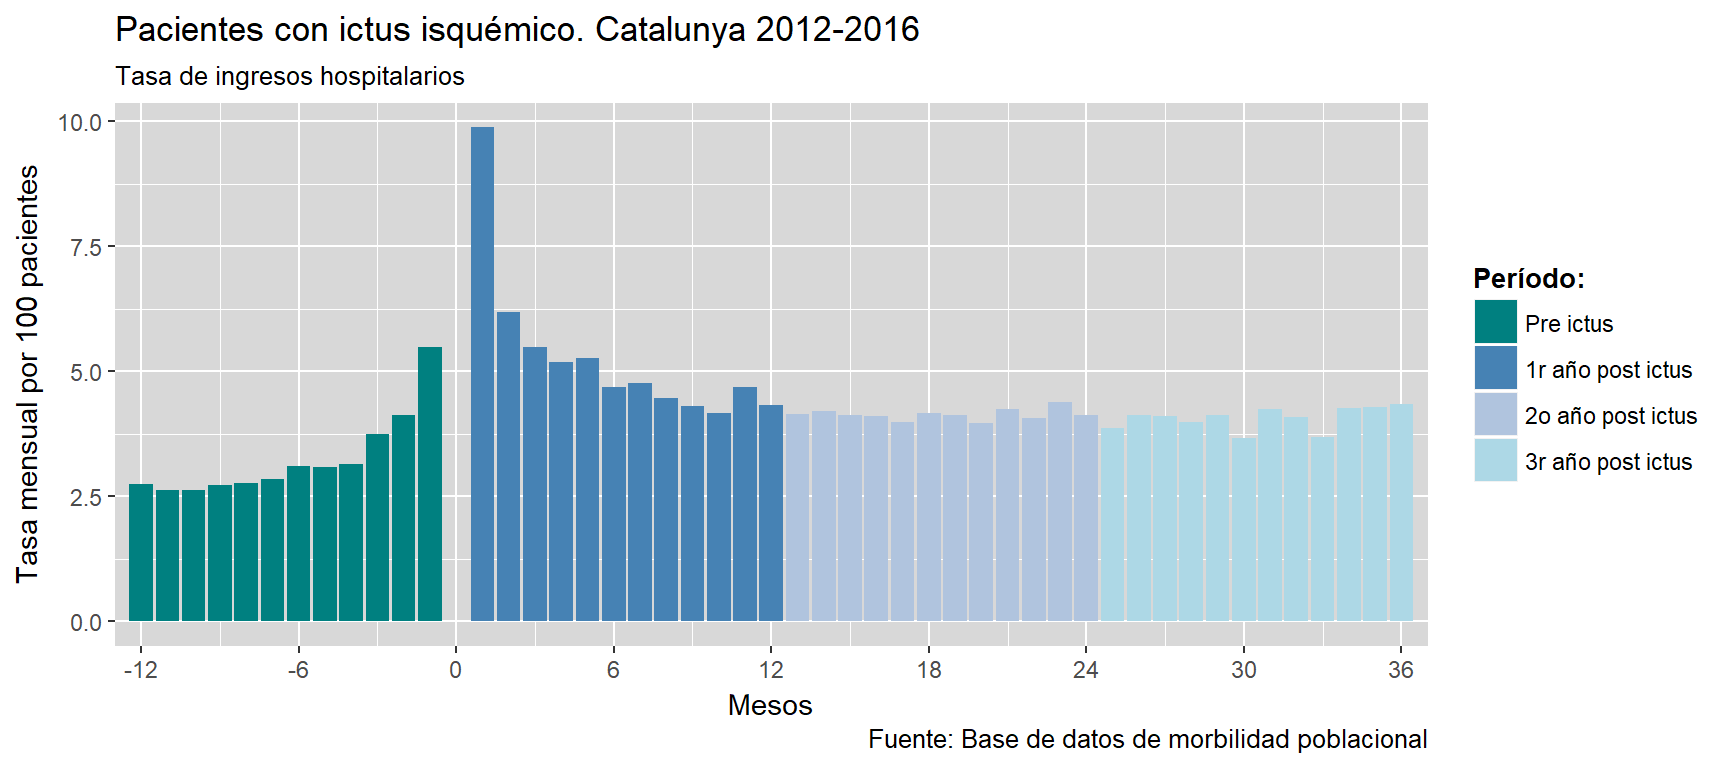


Figura III. Tasa mensual de uso de recursos socios-sanitarios


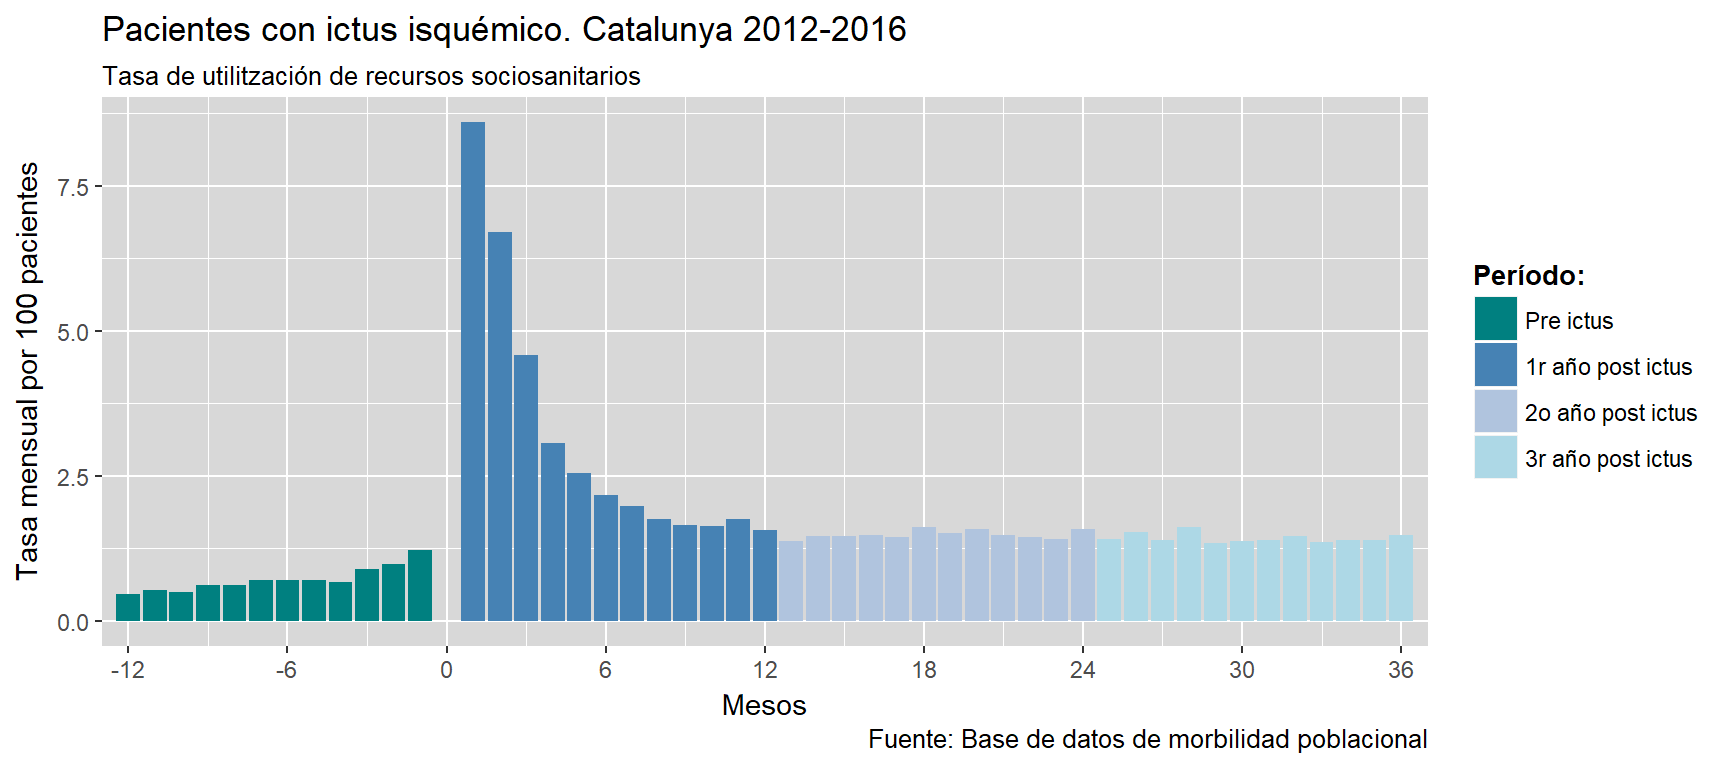


Figura IV. Tasa mensual de visitas a urgencias


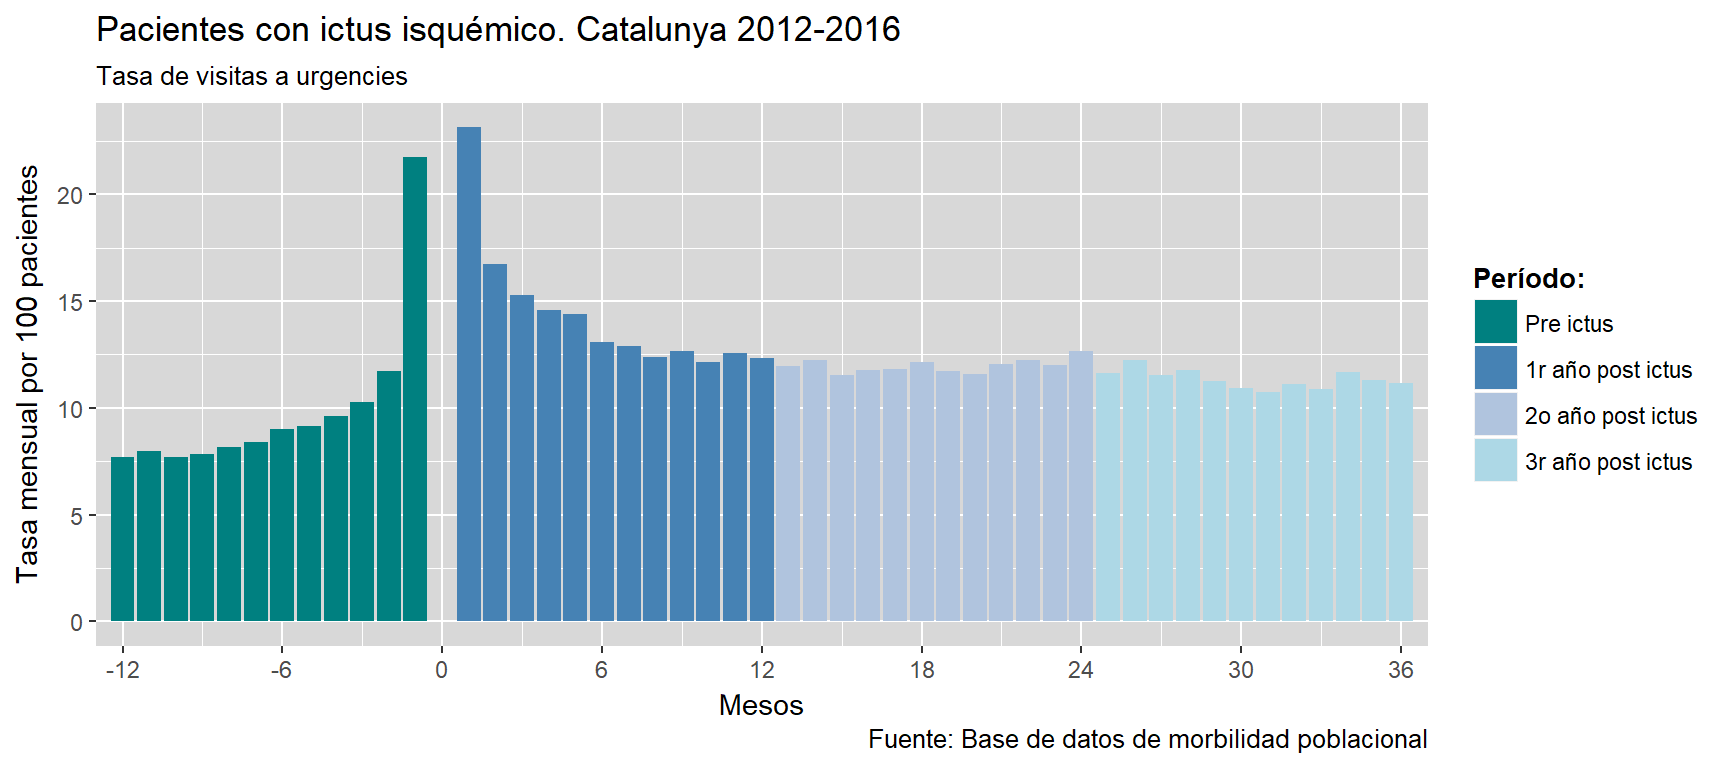


Figura V. Tasa mensual de uso de transporte sanitario no urgente


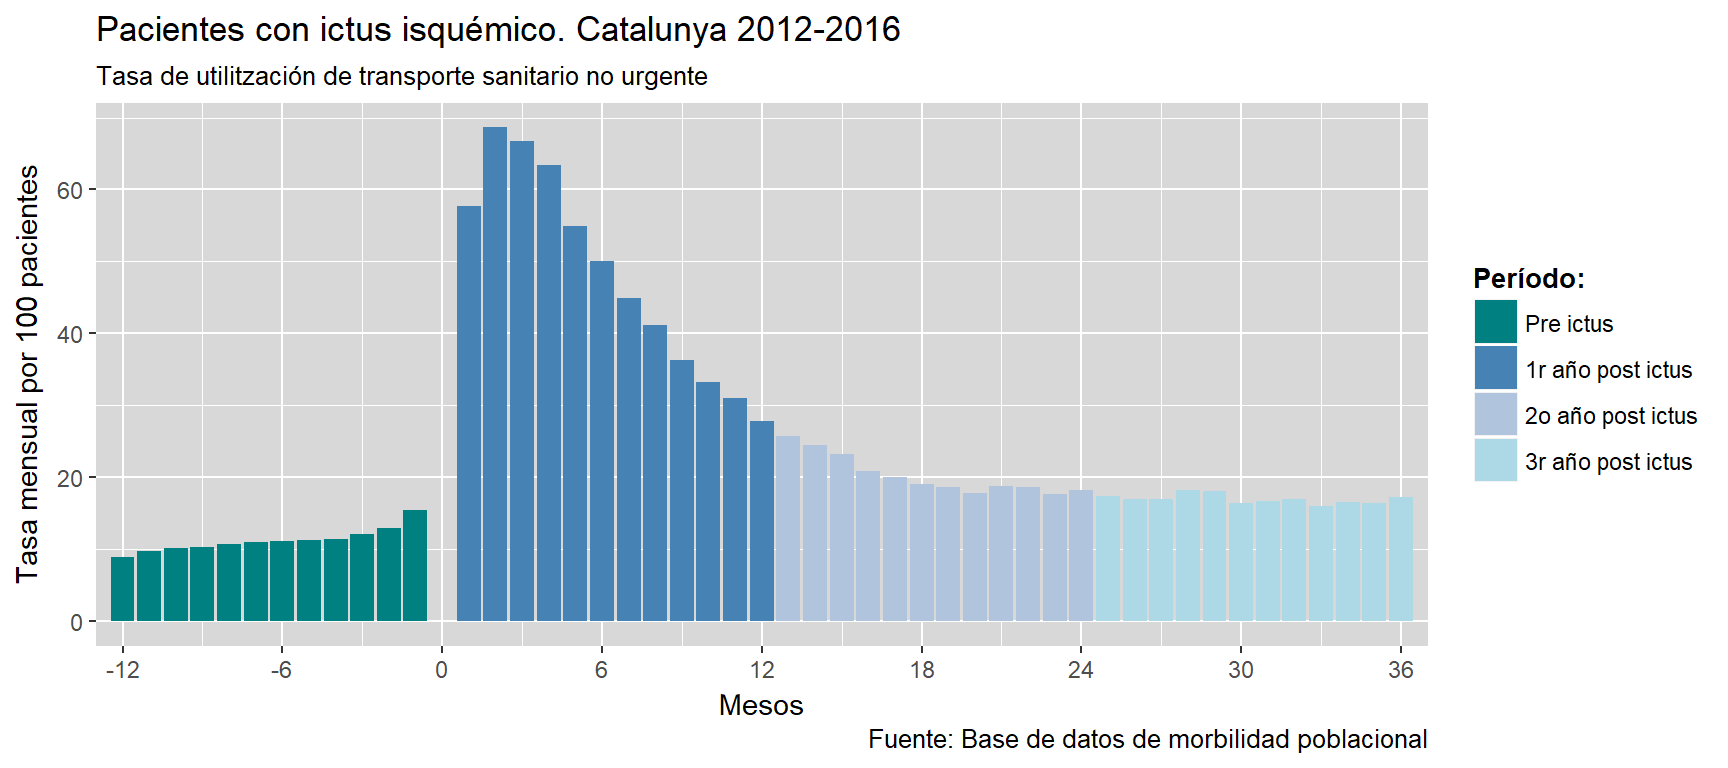


Figura VI. Tasa mensual de sesiones de rehabilitación


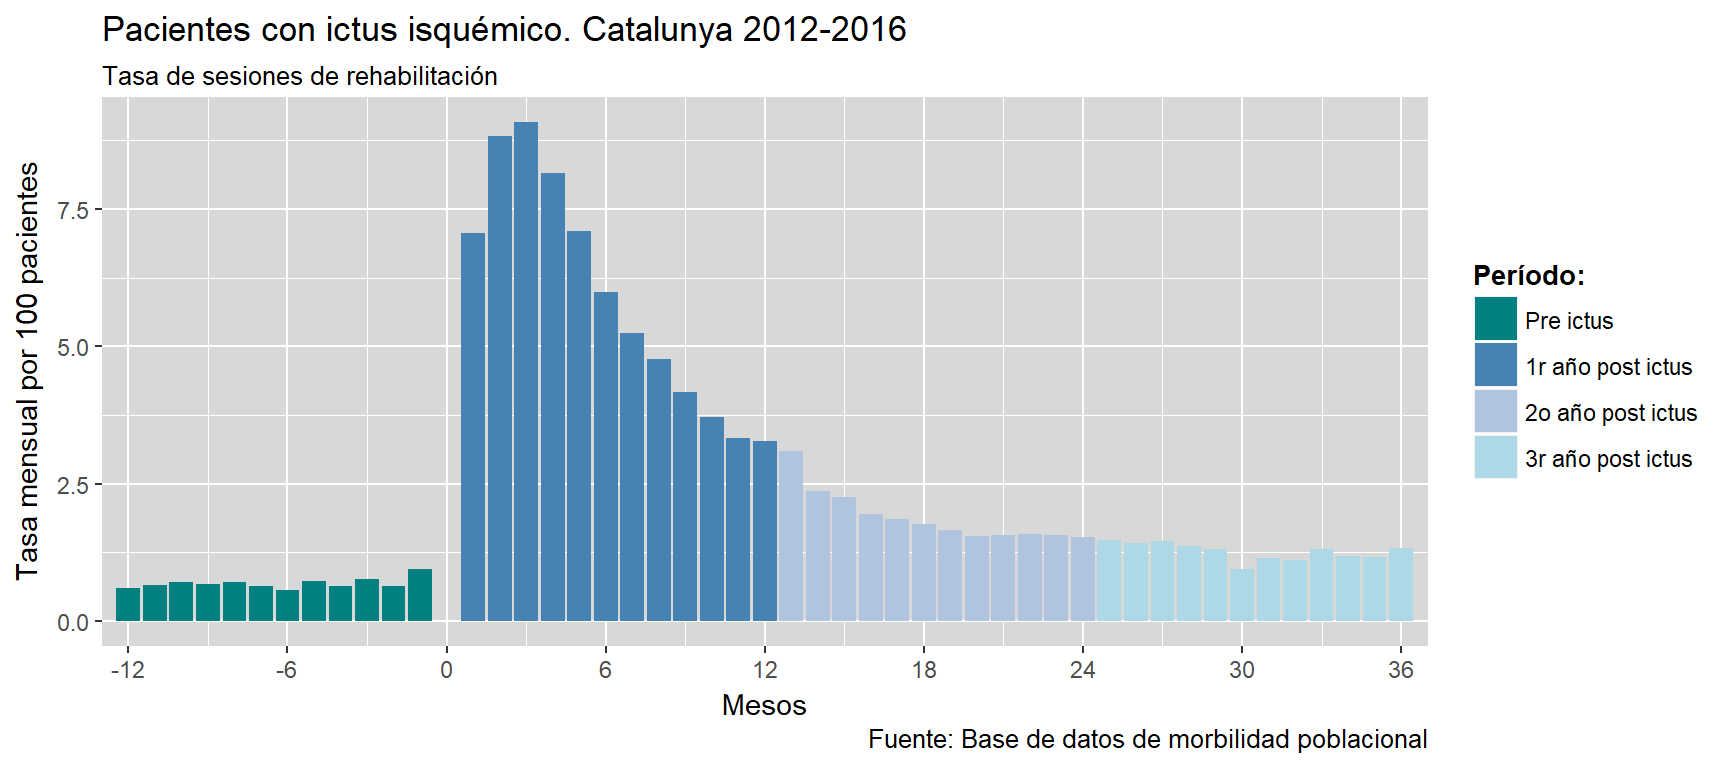


Figura VII. Tasa mensual de dispensación de fármacos antidepresivos


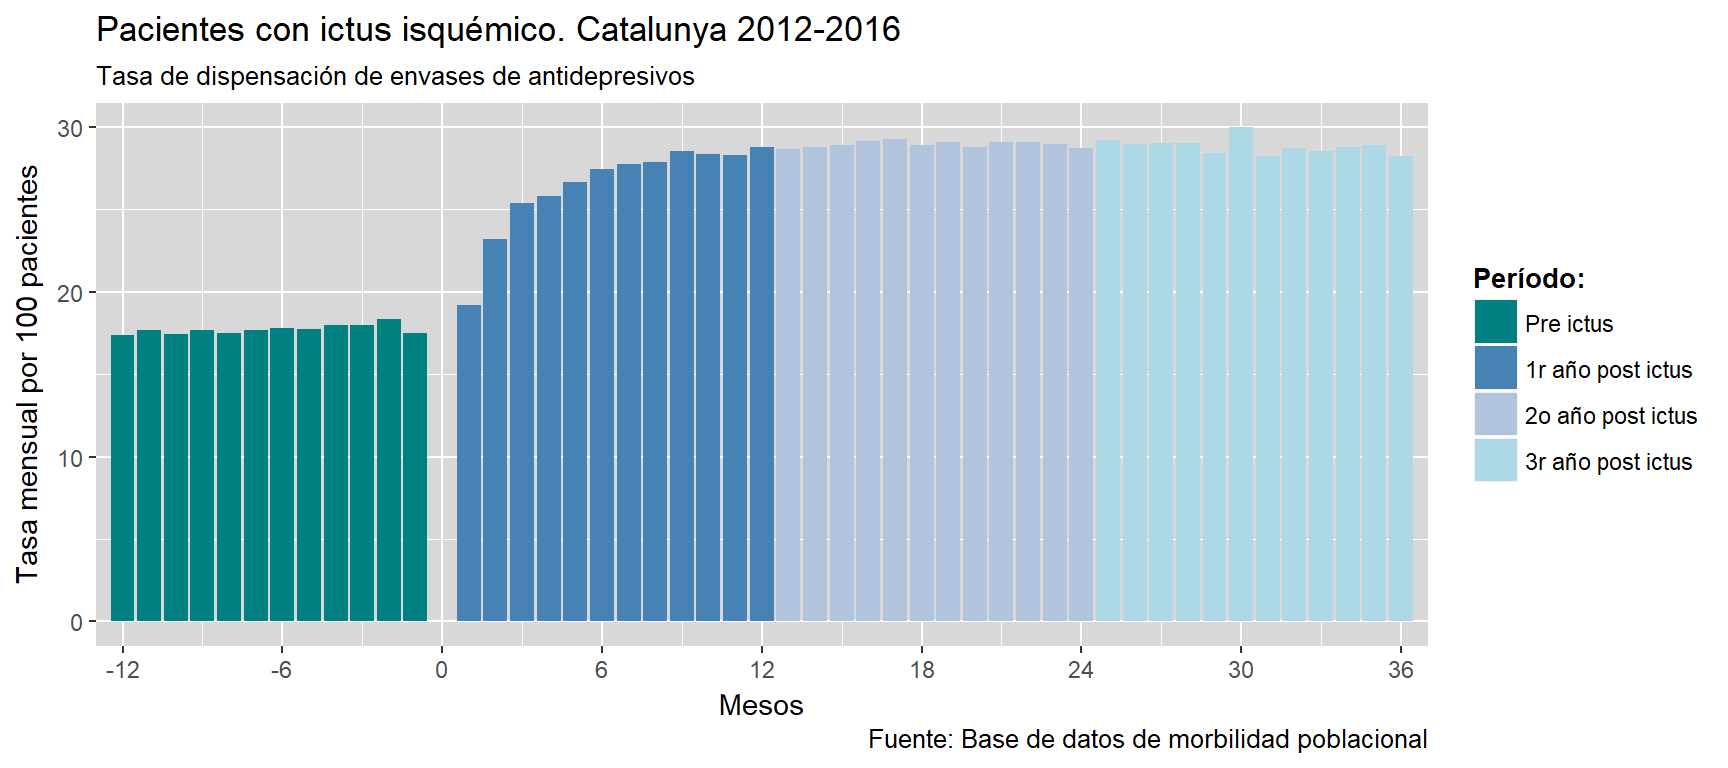

Supplement: mmc1 [file S2173580821001358:mmc1.docx]
